# Supplementary material
Source: PubMed Central journal article supplement (PMC3839418)
Supplement: NIHMS507422-supplement-Supplementary_Appendix.pdf [file NIHMS507422-supplement-Supplementary_Appendix.pdf]

Appendix.

*Multivariate analysis for contributing factors for ACL revision.*

| Variable | Zero-Order <i>r</i> |      |      |       |      | $\beta$ | $s^2$ | <i>b</i> |
|----------|---------------------|------|------|-------|------|---------|-------|----------|
|          | AGE                 | BMI  | Men. | Cart. | ACLR |         |       |          |
| Cart.    |                     |      |      |       | .328 | .32     | .11   | .0040    |
| Men      |                     |      |      | .008  | .531 | .21     | .23   | .0015    |
| BMI      |                     |      | .426 | .232  | .624 | .32     | .17   | .0209    |
| AGE      |                     | .505 | .405 | .510  | .601 | .20     | .12   | .1442    |
| Mean     | 28.3                | 24.9 | 1.1  | 0.8   |      |         |       |          |

$R^2 = .48^*$

\* $p < 0.05$
